# Supplementary material for: Effects of terminal electron acceptor strength on film morphology and ternary memory performance of triphenylamine donor based devices
Source: Royal Society of Chemistry journal article supplement (doi:10.1039/c3tc30228h), 2013-01-01
Supplement: c3tc30228h.pdf [file c3tc30228h.pdf]

## Electronic Supplementary Information

### Effects of Terminal Electron Acceptor Strength on Film Morphology and Ternary Memory Performance of Triphenylamine Donor Based Devices

Hao Zhuang,<sup>a</sup> Qijian Zhang,<sup>a</sup> Yongxiang Zhu,<sup>a</sup> Xufeng Xu,<sup>a</sup> Haifeng Liu,<sup>a</sup> Najun Li,<sup>a</sup>  
Qingfeng Xu,<sup>a</sup> Hua Li,<sup>\*a</sup> Jianmei Lu<sup>\*a,b</sup> and Lihua Wang<sup>a</sup>

<sup>a</sup> College of Chemistry, Chemical Engineering and Materials Science, China Petroleum and Chemical Industry key laboratory of organic wastewater adsorption treatment & resource, Soochow University, Suzhou 215123, P. R. China. Fax: +86 512 65880367; Tel: +86 512 65880368; E-mail: [lujm@suda.edu.cn](mailto:lujm@suda.edu.cn)

<sup>b</sup> Key Lab of Lithium Ion Battery Materials of Jiangsu Province, Institute of Chemical Power Sources, Soochow University, Suzhou 215006, P. R. China.

## 1. NMR Spectra

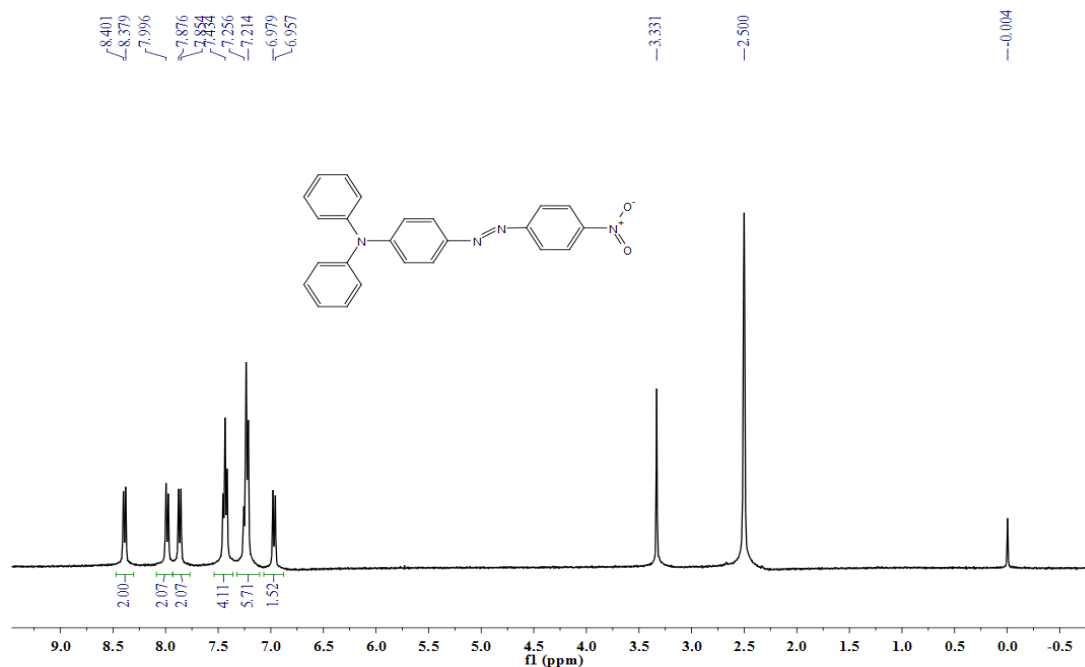

**Figure S1.** <sup>1</sup>H NMR spectrum of TPA-NAP in DMSO-d<sub>6</sub>.

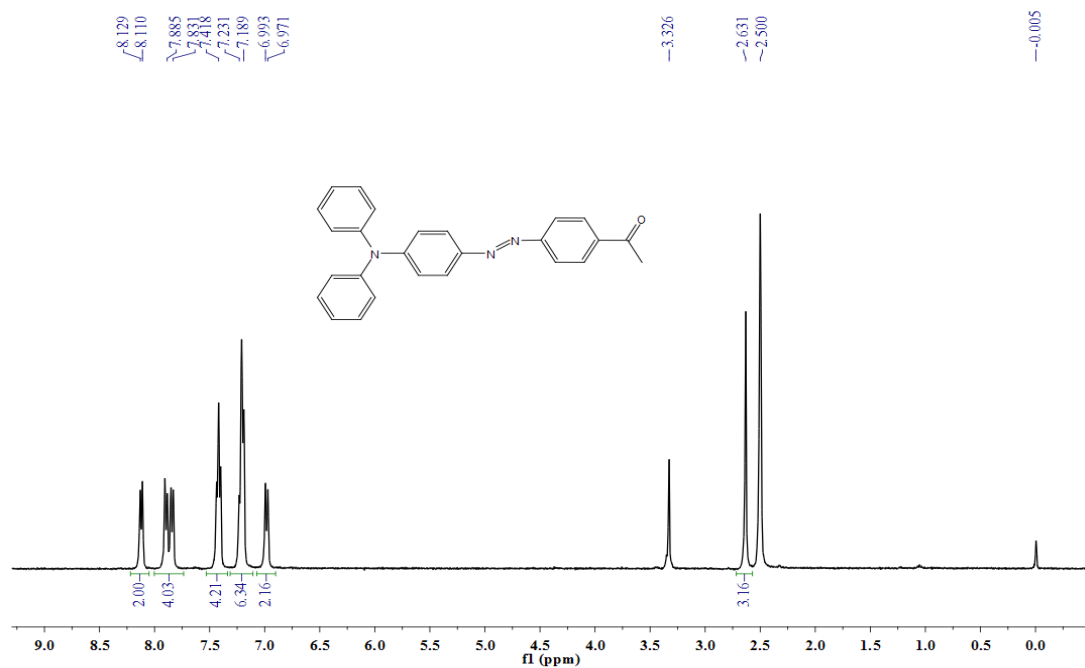

**Figure S2.** <sup>1</sup>H NMR spectrum of TPA-AAP in DMSO-d<sub>6</sub>.

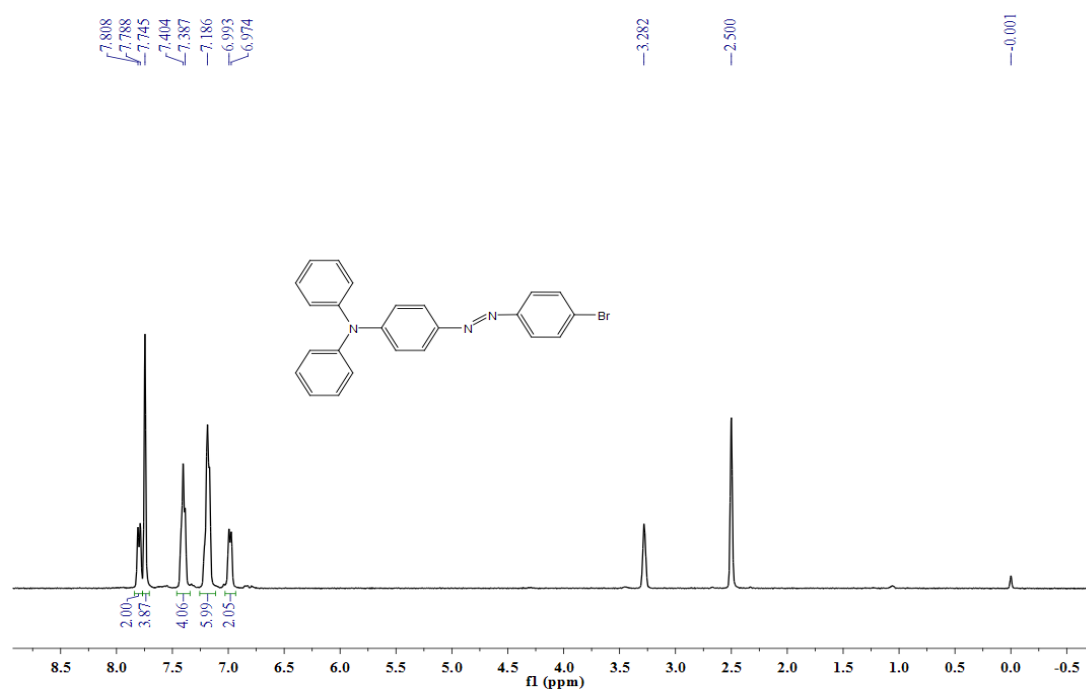

**Figure S3.** <sup>1</sup>H NMR spectrum of TPA-BAP in DMSO-d<sub>6</sub>.

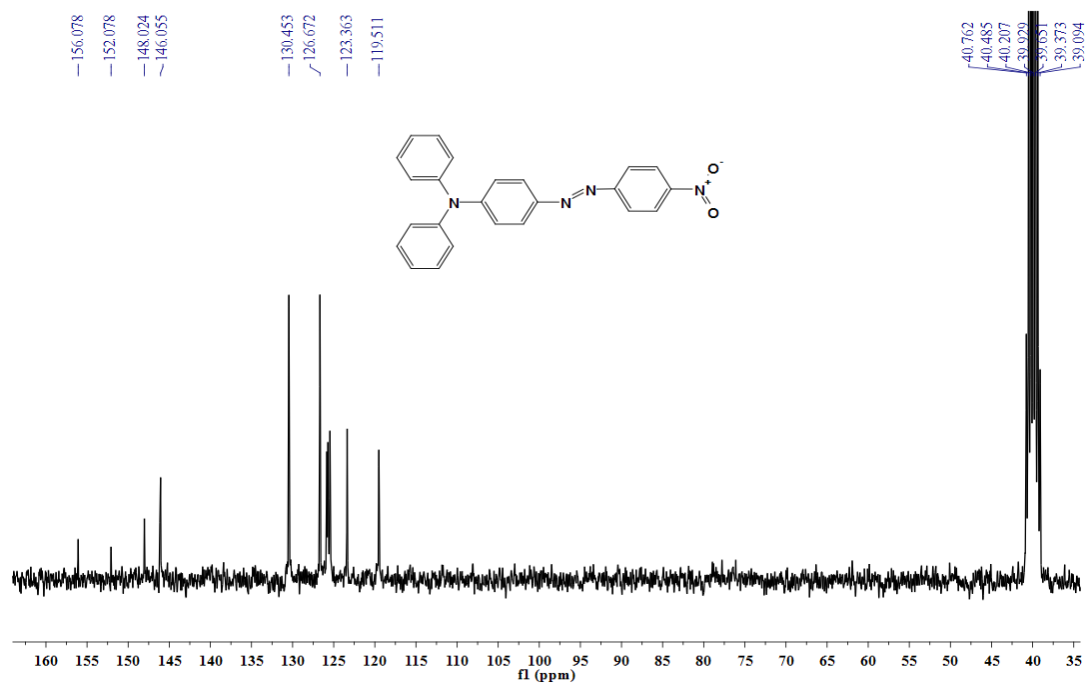

**Figure S4.** <sup>13</sup>C NMR spectrum of TPA-NAP in DMSO-d<sub>6</sub>.

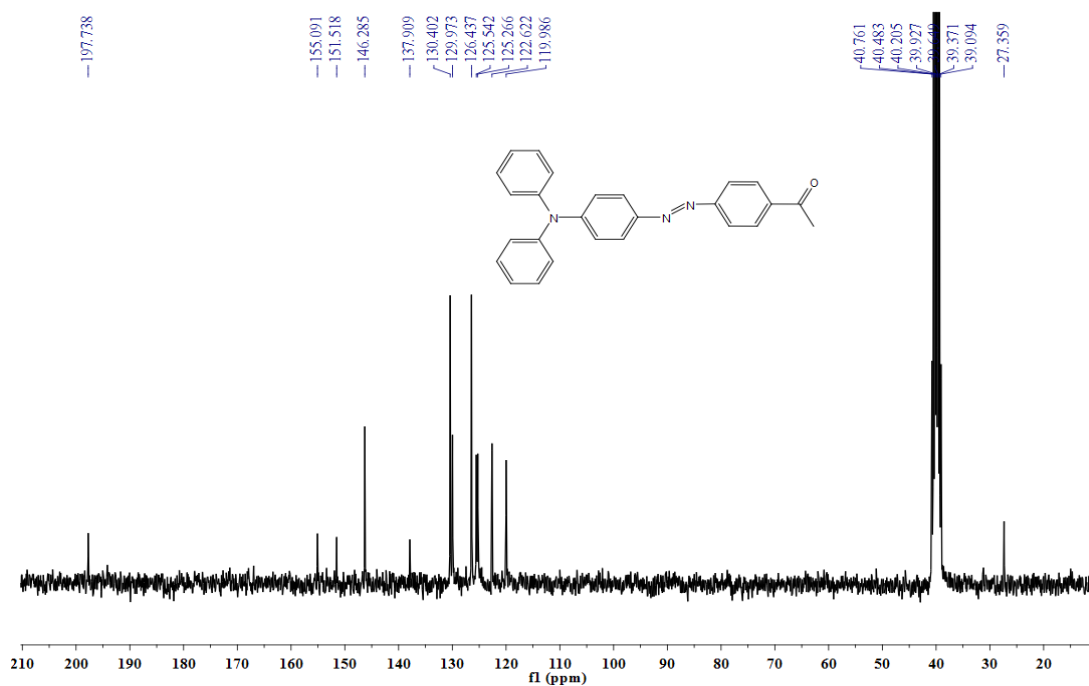

**Figure S5.** <sup>13</sup>C NMR spectrum of TPA-AAP in DMSO-d<sub>6</sub>.

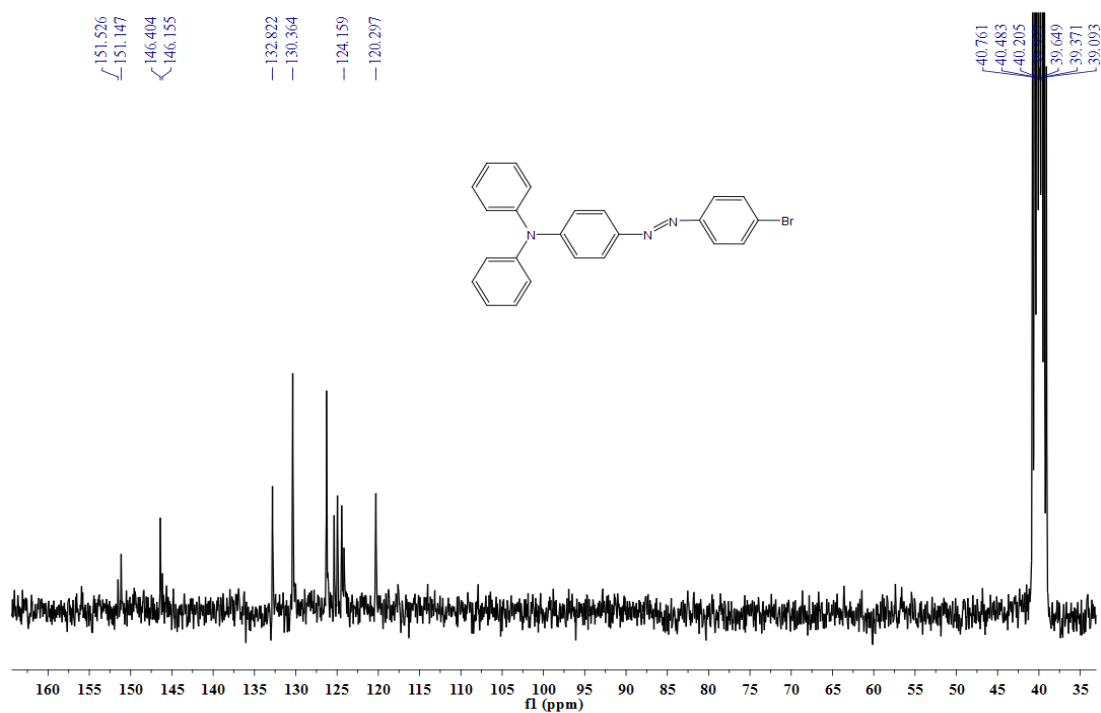

**Figure S6.** <sup>13</sup>C NMR spectrum of TPA-BAP in DMSO-d<sub>6</sub>.

## 2. Optical Absorption Spectra of the Small Molecules

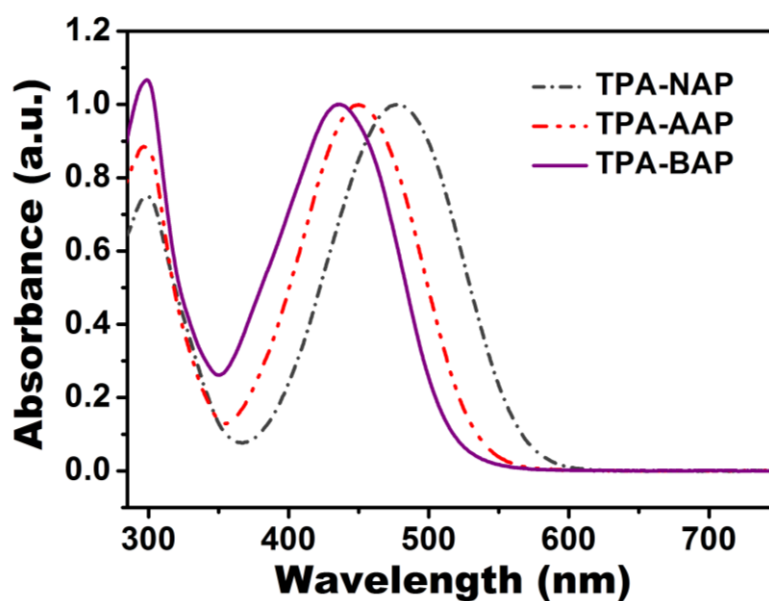

**Figure S7.** the UV-vis absorption of TPA-NAP, TPA-AAP and TPA-BAP in THF solution.

## 3. Cyclic Voltammogram of 4-bromo-N,N-diphenylaniline

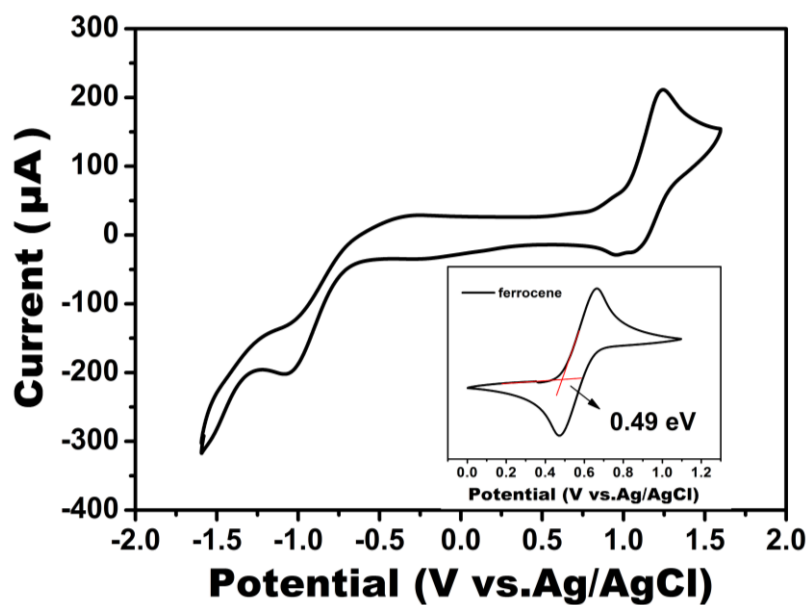

**Figure S8.** Cyclic voltammogram of 4-bromo-N,N-diphenylaniline in acetonitrile solution. The scan rate was 100 mVs<sup>-1</sup>. Here the reference onset oxidation potential of ferrocene is 0.49 V.

#### 4. 3D-AFM Topography Images of the Thin Films.

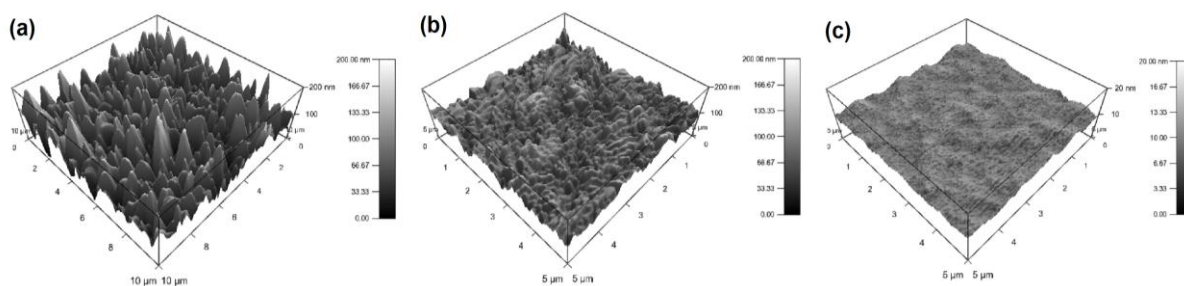

**Figure S9.** X 3D-AFM topography images of the three small-molecule films: (a) TPA-NAP; (b) TPA-AAP; (c) TPA-BAP.

#### 5. Atomic Force Microscopy (AFM) of the TPA-NAP Film with Prolonged Annealing Time.

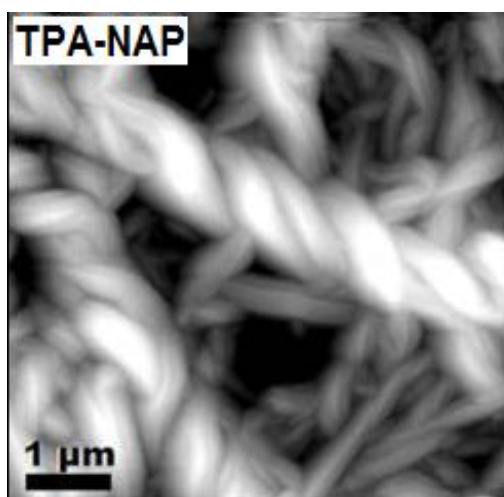

**Figure S10.** Topography of TPA-NAP nanofilm on ITO substrate after annealing at 80 °C for 12-h.

## 6. X-ray Diffraction Patterns of the Annealed Films.

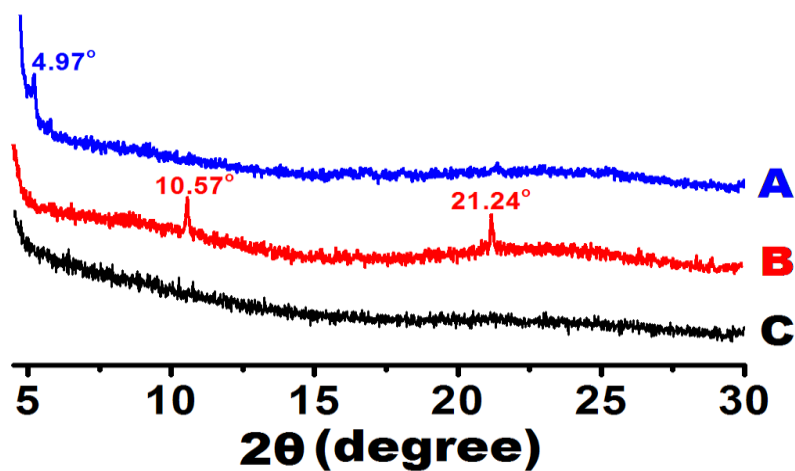

**Figure S11.** XRD patterns of the films annealed at 80 °C: A) TPA-NAP; B) TPA-AAP; C) TPA-BAP.

## 7. *I-V* Curves of ITO/TPA-NAP/Al Sandwich Device with Various Film Thicknesses.

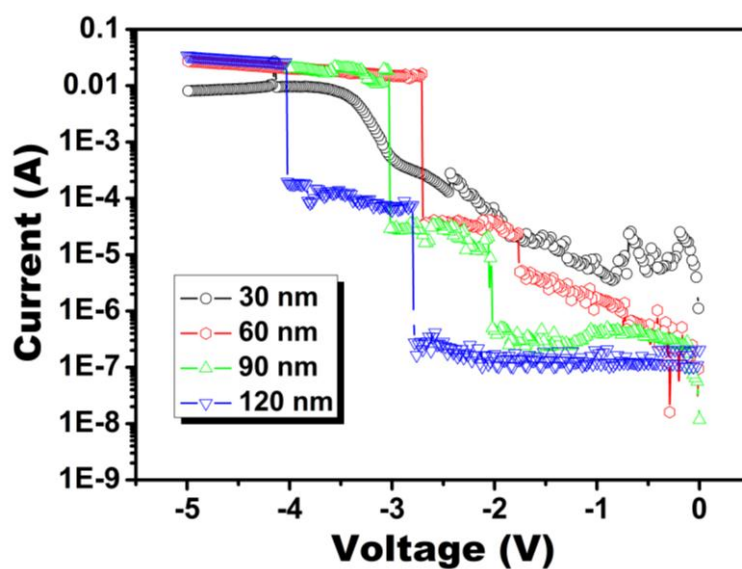

**Figure S12.** The *I-V* characteristics of the ITO/TPA-NAP/Al sandwich memory devices with various film thicknesses.

## 8. *I-V* Characteristic Based on the ITO/TPA-BAP/Al Sandwich Device.

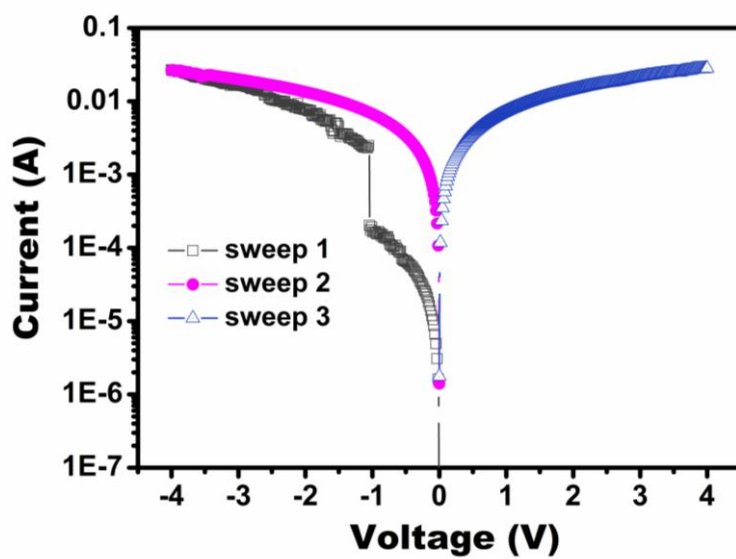

**Figure S13.** *I-V* curve of the memory device based on TPA-BAP as the active material.
